# Supplementary material
Source: publisher site journal article supplement (https://www.dovepress.com/article/540460)
Supplement: Supplementary file 1 [file 540460%20Supplementary%20Material.docx]

Supplementary Figure S1. Correlation and agreement between eAHI and pAHI

Supplementary Figure S1A. eAHI and pAHI correlational analysis
Abbreviations: AHI, apnea-hypopnea index; pAHI, physician-read AHI; eAHI, smartwatch-estimated AHI; ICC, intraclass correlation coefficient

Supplementary Figure S1B. Bland-Altman plot to assess agreement between eAHI and pAHI.

Abbreviations: AHI, apnea-hypopnea Index; pAHI, physician-read AHI; eAHI, smartwatch-estimated AHI


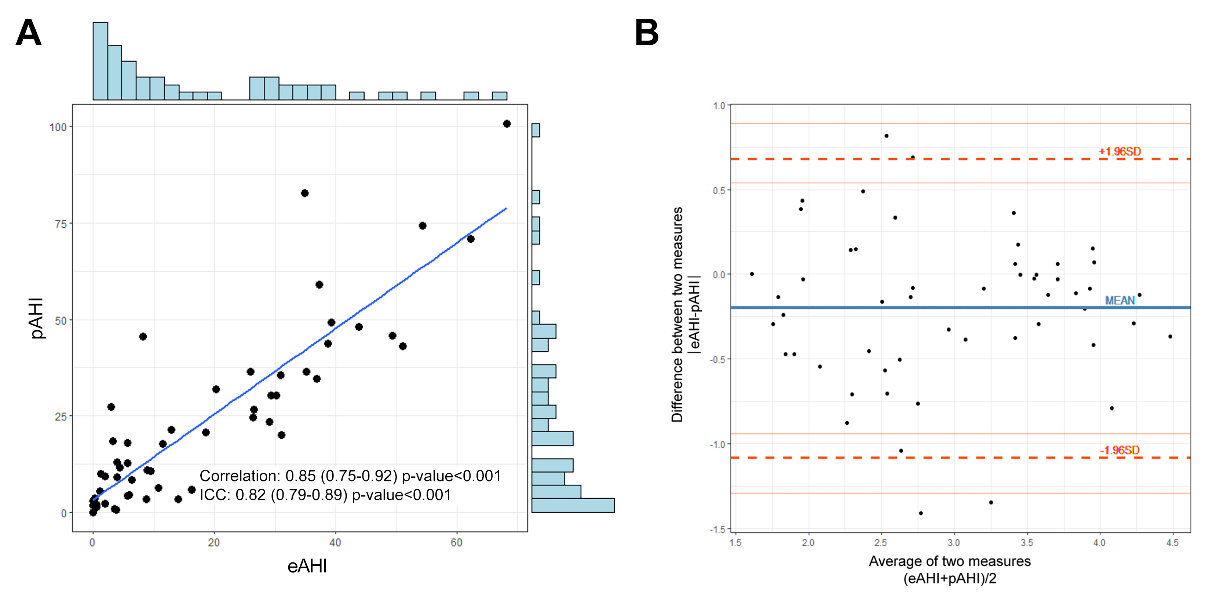


Supplementary Figure S2. ROC curve analysis for prediction of pAHI using eAHI values.


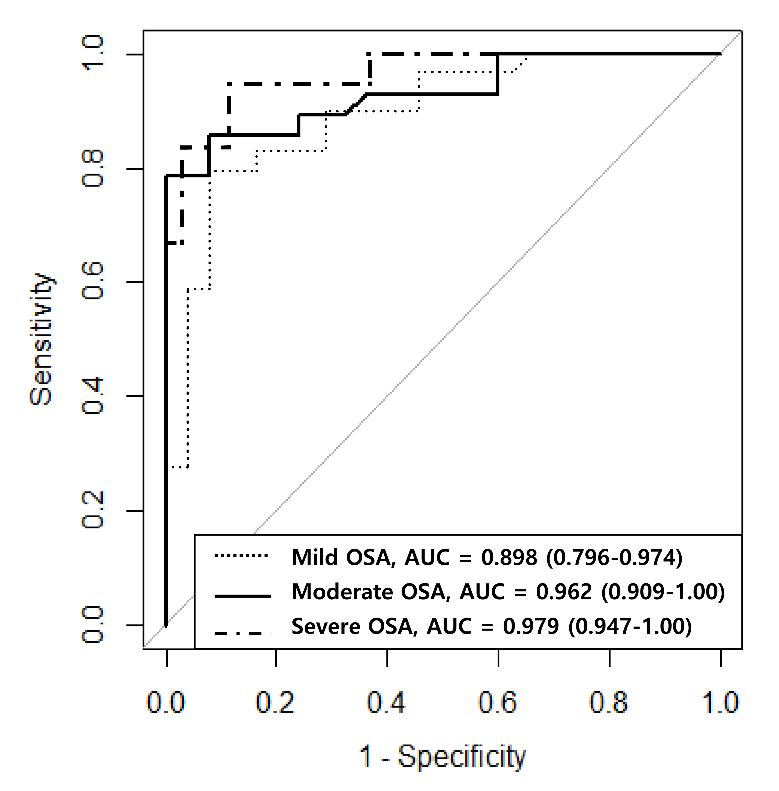


Dotted line, Dotted line, ROC curve for predicting pAHI ≥ 5 events/h from eAHI value measured by a wearable device; dashed line, ROC curve for predicting pAHI ≥ 15 events/h from eAHI values measured by a smartwatch; dashed-dotted line, ROC curve for predicting pAHI ≥ 30 events/h from eAHI values measured by a smartwatch.

*Abbreviations:* OSA, obstructive sleep apnea; AHI, apnea-hypopnea index; pAHI, physician-read AHI; eAHI, smartwatch-estimated AHI

Supplementary Figure S3. Confusion matrix of apnea severity classification: pAHI vs. eAHI.

Supplementary Figure3A: Apnea vs. healthy

Supplementary Figure3B: Moderate-severe apnea vs. others (healthy and mild apnea)

Supplementary Figure3C: Severe apnea vs. others (healthy and mild-moderate apnea)


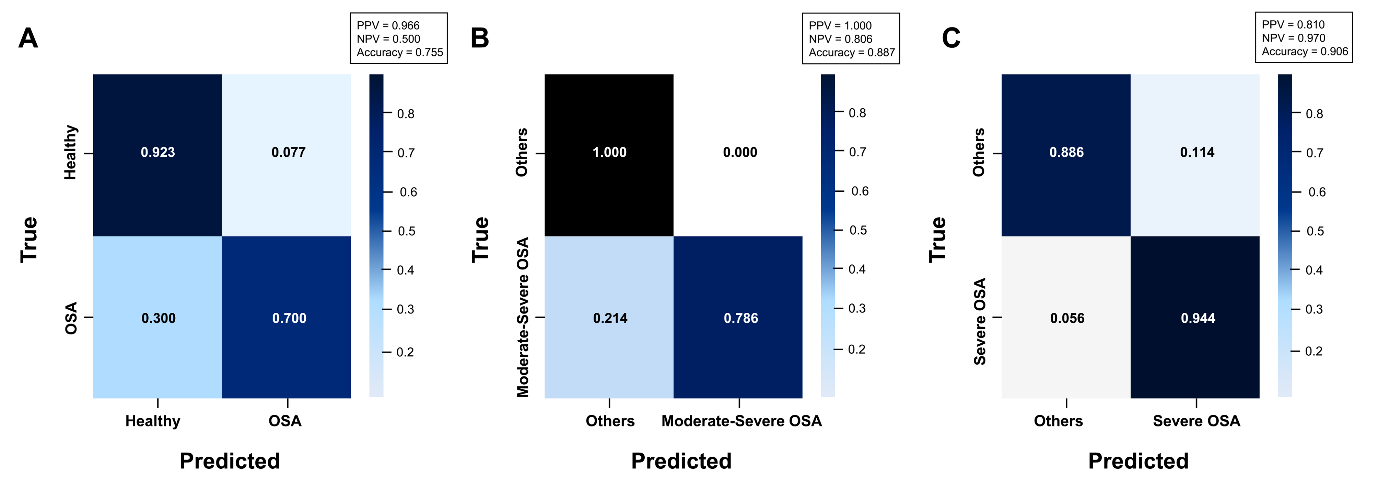


*Abbreviations:* AHI, apnea-hypopnea index; pAHI, physician-read AHI; eAHI, smartwatch-estimated AHI, PPV = positive predictive value; NPV = negative predictive value
